# Supplementary material for: Discovery and genetic characterization of novel paramyxoviruses from small mammals in Hubei Province, Central China
Source: PubMed Central journal article supplement (PMC11145887; doi:10.1099/mgen.0.001229), 2024-05-03
Supplement: mgen-10-01229-s001.pdf [file mgen-10-01229-s001.pdf]

### Huangshi Niviventer confucianus morbilli-like virus (Huangshi10)



### Shiyan Crocidura tanakae henipavirus (Shiyan201)



Figure S1: TMHMM posterior probabilities of ORF X Y and ORF Z in Huangshi Niviventer confucianus morbilli-like virus and Shiyan Crocidura tanakae henipavirus. The x-axis represents the amino acid length and the y-axis represents the posterior probability.

|                                                       |                                                                                                                                                                                                                                                                                                 |      |
|-------------------------------------------------------|-------------------------------------------------------------------------------------------------------------------------------------------------------------------------------------------------------------------------------------------------------------------------------------------------|------|
| Beilong virus strain Rn/Jingzhou151 (Jingzhou151)     | .....MSQLAAHNLA MSNFYGT HQGDL SSGSQKGE EQ.....VQGVVIRYVSMIVGLLSLFTI IALNVTNI IYMTESGGT MQSIKTAQGSIDGSMREISGVI MEDVDPKPTDLINSMVSYNIPPAQLSMIHQIIKNDVLRQCTPSF                                                                                                                                      | 133  |
| Tailam jeilongvirus                                   | .....MSQLAAHNLA MSNFYGT HQGQSTSQKKEEQ.....PVQGVIRYASMI VGLLSLFTI IALNVTNI IYMTESGGT MQSIKNAQGSIDGSMKDL SGTIMEDIKPKTDLINSMVSYNIPPAQLSMIHQIIKNDVLRQCTPSF                                                                                                                                          | 133  |
| Jingzhou Apodemus agrarius jeilongvirus (Jingzhou148) | .....MSQLAAHNLA MSNFYGTQRGDIL ESKKSDLP.....DPQPIFRYASMI VGLLSLFTI IALNVTNI IYLTESGGT MQSIKNNQDLSGVSREASGLLIEDIKPKTDLINSMVSYNIPPAQLSMIHSMIKNEVLRQCTPSF                                                                                                                                           | 133  |
| J-virus                                               | .....MNPVAMS NFYGINQADHLREKGDQPE.....KGPSVLTYYSLITG LLSLFTI IALNVTNI IYLTGSGGT MATIKDNQQSMSGSMRDISGMLVEDLKPCTDLINSMVSYTIPPSQISAMSAMIKNEVLRQCTPSF                                                                                                                                                | 128  |
| Jingzhou Mus musculus jeilongvirus (Jingzhou25)       | .....MNPVAMS NFYGINQGDHLREKGDQPE.....KGPSVLTYYSLITG LLSLFTI IALNVTNI IYLTGSGGT MATIKDNQQSMSGSMRDISGMLIEDLKPCTDLINSMVSYTIPPSQISAMSAMIKNEVLRQCTPSY                                                                                                                                                | 128  |
| Myodes paramyxovirus                                  | .....MNPLAVHTAAMS NFYGVNATQTTDARKENHI.....GGQDVFRYTSMI VGLLSLFTI IALNVTNI IYLTESGGT MESIKNSQQSLSGSMKETTGI LIEDLKPCTDLINSMVGYNIPTQLSLIYSTIKNDVLRQCTPTF                                                                                                                                           | 133  |
| Lophuromys jeilongvirus 1                             | .....MADYYKTGGIITPVKKPTEEERN.....HKSNNLAYSILGLILSVIVL LLLNITNITMTTIKKDSINGALNSKPIMTETQGNKISDLIESDLIPKTNLNNMVSYQIPTSLSLTQIYSLIKRDVLRQACTPKF                                                                                                                                                      | 125  |
| Lophuromys jeilongvirus 2                             | .....MIMNPINTQMTNYYGVGNKDR EAIQTSS TNS.....TCHSALYTSMI VGLLSLFTI IALNVTNI IYLTGSGGSMMATKEKQESLGLVRDSVSLTTEIIPKVDL INNIVSYSTIPPSQLTQIQHTIKNEVLRQCGPSF                                                                                                                                            | 134  |
| Shiyan Niviventer confucianus jeilongvirus (Shiyan22) | MPSSPSLRNDRSYITK LGEYGTANGIPEGSNGKQGSVKGWTTSDKASSV LNA C S W L L G M T V S V V L I I F L I L G L L A L R T M R N E L D A Q R L K I D Q S T E V T V Q L G S L R D L I N P R I D L I N N M V S Y T I P S L M N Q I K H D L A V E I Q K K N N V V F                                                | 150  |
| Beilong virus strain Rn/Jingzhou151 (Jingzhou151)     | MFNNTICPLAENP THSR Y FEEVNLDSI SECGPDMHLGLGVNPEFIEFPSPAPGSTKPGSCVRLPSFSLSTTFAYIHTIMGHGCCSELDVGDHYFVSGRIADAGHEIPQFETISSWFINDKINRRSCTVAAGAMEAWMGCQVIMTETFYDD                                                                                                                                      | 283  |
| Tailam jeilongvirus                                   | MFNNTICPLAENP THSR Y FEEVNLDSI SECGNEMSL ELGT EPEFIEYPSAPGSTKPGSCVRLPSFSLSTTFAYIHTIMGHGCCSELDVGDHYLAIGRIADAGHEIPQFETISSWFINDKINRRSCTVAAGVMEW MGCQVIMTETFYDD                                                                                                                                     | 283  |
| Jingzhou Apodemus agrarius jeilongvirus (Jingzhou148) | MFNNTICPIVENPAHSHYFEEVNL EGFSGCKTSTSKI INSNAS FVEYPSFIPGSTKPGSCIRFPSPFLSTSI FAYIHTIMGHGCCSELDIGDHYFVSGRIADHGHDQPVFETLETFWVNDKINRRCTVAAGKVGAWMACIIMTETFYED                                                                                                                                       | 283  |
| J-virus                                               | MFNNTICPIAEHPVHTSYFEEVGEIATSMCTGTNRKLVVNQGINFVYPSFIPGSTKPGSCVRLPSFSLGLEVFAYAHAITQDDCTSSSTPDYIYFVSGRIADHGTDPVVFETLEAWFLD DKMNRRC SVTAAGKGGWLGCSILVGSFTDE                                                                                                                                         | 278  |
| Jingzhou Mus musculus jeilongvirus (Jingzhou25)       | MFNNTICPIAEHPVHTSYFEEVGEIATSMCTGTNRKLVVNQDISFVEYPSFVPGSTKPGSCVRLPSFSLGLEVFAYAHAITQDDCTSSSTPDYIYFVSGRVADHGTDPVVFETLEWVLD DKMNRRC SVTAAGKGGWLGCSILTGSFTDE                                                                                                                                         | 278  |
| Myodes paramyxovirus                                  | MFNNTICPVAEHP IHSSYFEEINLSSFAACALPNGRVMNSEVTTYEYPSFIPGSTSPGSCVRLPSFSLPTI FAYSHTIMGHGCCSELDVGDHYFVSGRIADHGHENPVFEITTEWFINDKVNRRCSTVAAGKVGAWMACIIMTETFLLDD                                                                                                                                        | 283  |
| Lophuromys jeilongvirus 1                             | DHEGSCPVNSNPFHSGSFLINRNTFSRCPDPNNLGMRESIKLMDYPSFIPGPTRPGGCSRDPFDLNKIKI FAYIHTNVPQCGCYTMTMQVFNIGRVDVNDAMPFFETILTQWYLDLGNLRKSCITVVTSD EGAWILCIVTSESEEKD                                                                                                                                           | 275  |
| Lophuromys jeilongvirus 2                             | VYVNTVCPVVENPSHSQHFKMINPYTISECANTGSFIQVKSHISFIDYPSFIPGSTRKGGCVRLPSFSLSDTI FAYAHNIIAQCCQDSSSQDQYLSIGRIEDHGTDPVVFETIAEWYLDLGNLRKSCSVASGDTYAIMGCTIVTSDERTD                                                                                                                                         | 284  |
| Shiyan Niviventer confucianus jeilongvirus (Shiyan22) | EYKNNTCPKVPYVHSPHFRFDQDSLTRQNRGFTVQLNGEITIKEMPSFIPQSQTITICTRIPSLAVSPTIWAYIHTNVRIRHCNDSSTSNQVAFITGVIGETSGDAPHFETLSSWYLDLDDVNRKSCAVAAAGVTGAWMVCTIVTSTFRDD                                                                                                                                         | 300  |
| Beilong virus strain Rn/Jingzhou151 (Jingzhou151)     | LNSLDTGKLTISYLDVFGRRKKEWITRSEILYDYTYTSVYFVSGGVVVDGTYVYFLWGLS LSPPIEETAYCFAPDCSNYNQRMCNEAQRPSKFGHRQMVNGILKFKTTSTGKPLLSVGTLSPSVVPFGSEGRMLMYSEITKIIYLYLRSTS                                                                                                                                        | 433  |
| Tailam jeilongvirus                                   | LDSLDTGKITISYLDVFGRRKKEWITRSEILYDYTYTSVYFSTIGSGVVVDGTYVYFLWGLS LSPPIEETAYCYAPGCSNYNQRMCNEAQRPAKFGHRQMANAILRFKTNMSGKPSISVRTLSPTVIPFGTEGRLIYSDFTKIYLYLRSTS                                                                                                                                        | 433  |
| Jingzhou Apodemus agrarius jeilongvirus (Jingzhou148) | MMSPEHGKVTISYLDIYGRKREMYSKSEIRVDYPTMSYFSTIGSGAVVDGTYVFLVWGAMTFPIEQNAYGNAPGCS S W T Q M Q N O R P P L G N R Q I L N A L L Y F K T N D G K P I L S R A F T P T N G V L G S E G R L I Y F E T T Q K L Y I L R S T S                                                                                | 433  |
| J-virus                                               | LTSPEVNRISLSYMDTFGKKKDWLYTGSEVRADQSWALFFSVSGGVVIGDTYVYFLWGLLNHPINVDAMCRAPGCGSPTQSLCNYAIKPKQEWGGNQLVNGILHFKHDTNEKPTLHVRTLSPDNWMMGAEGRLFHFHNSGKTFIYTRST                                                                                                                                           | 428  |
| Jingzhou Mus musculus jeilongvirus (Jingzhou25)       | LTSPEVNRVLSYMDAFGKKKDWLYTGAEIRADQSWAISFFSVSGGVVVDGTYVYFLWGLLNHPINVDAMCRAPGCGSPTQSLCNYAIKPKQEWGGNQLVNGILHFKHDTNEKPTLHVRTLSPDNWMMGAEGRLFHFHNSGKTFIYTRST                                                                                                                                           | 428  |
| Myodes paramyxovirus                                  | LSSRDTGRVSIYLDVYGRKREWITRSEILYDYTYTSVYFVSGGVVVDGTYVYFLWGLLNHPINVDAMCRAPGCGSPTQSLCNYAIKPKQEWGGNQLVNGILHFKHDTNEKPTLHVRTLSPDNWMMGAEGRLFHFHNSGKTFIYTRST                                                                                                                                             | 433  |
| Lophuromys jeilongvirus 1                             | YADQIGRVIYMDIYGRKKS WYLDPEIQFDLPMAAMYFSGSGVSDGKIYVLYIYGLMTAVSGDVFCDAPGCDNPSQDMCKKASMPKRSRQRQMVNGLFTFDDNPLEAPKPIVKLIPPSQNVWGSRGRLYKSDYPKIFFLYISSDS                                                                                                                                               | 425  |
| Lophuromys jeilongvirus 2                             | YLNPGIGRLSITYLDVFGRRKKEWITFQEEITELDREYLALYFVSGGVVVDGTYVYFLWGLLNHPINVDAMCRAPGCAAVNQVQNAATKPNWFGHRQIVNGILSFTADFESRPRLRVRTIPPSKTLWGAEGRLMYSTVARKTYIYVRS TG                                                                                                                                         | 434  |
| Shiyan Niviventer confucianus jeilongvirus (Shiyan22) | YCSPEISPIVLSFMDVFGRRKRYWYENSMLK FANL FVSLHIGVSGVIVDGVVYIPFYAGLKTNDTLNSFC HAPGCSNPEANTQNAITKITYLCSRITINGILVINDSPMTRPKLDVVVINARSNWLGAEMRLFHNYRLGITVYVRS SGG                                                                                                                                       | 450  |
| Beilong virus strain Rn/Jingzhou151 (Jingzhou151)     | WHALPLTGLFVLGPPTSISIVQRAVSRPGEFPCGASNRCPKDCVTVGVYD LFFLGSRYEYAAVYLNSETYRVNPTLALINQNTI IASKKITTESQRAGYITTTTCFVFKLRVWCISVVELAPSTMTAYEPIPFPLYQLDLTCKGKNGSLA                                                                                                                                        | 583  |
| Tailam jeilongvirus                                   | WYVLP L T G L L I L G P P V S I S W T Q E A V S R P G E Y P C G A S N R C P K D C I T G V Y D L F P L G A R Y E Y A V Y V L N A E T Y R V N P T L A L I D R S K I I A R K K I T T E S Q K A G Y I T T T C F V F K L R V W C M S V E L A P A T M T A F E P V P F L Y Q L D L T C K R N N G T T A | 583  |
| Jingzhou Apodemus agrarius jeilongvirus (Jingzhou148) | WHALPLTGVINMGPPISITWFEQRAVSRPGNAPCGASNRCPRTGTVGVYD LFFLGTSYEYSVTAYLDSETRRINPVLA FIDQNSI IYRRTVTNTTQKAEYITTTTCFVKLRVWCISVVELAPSTMTAYEPIPFPLYQLDLTCKRNGTGA                                                                                                                                        | 583  |
| J-virus                                               | WHTLPQVGLITLGWPLSVQVMDITSRPGQSPCEYDNRCPHQCVTGVYD LFFLGVSYEYSVTAYLDQVQSRMNPKI ALVGAQEKIYEKTIITNTQHADYITTTSCFAYKLRVWCISVVENSPGVITTRQVPVFLYHLNLGQDDTSTGSL                                                                                                                                          | 578  |
| Jingzhou Mus musculus jeilongvirus (Jingzhou25)       | WHALPQVGLITLGWPLSVQVMDLPI SRPGQPPCEYDNRCPHQCVTGVYD LFFPIGVSFEYAVTAYLDQVQQRMNPKI AIVGTQEKIYERQITNNMQHADYITTTSCFAFKLRVWCISVVENSPGVITTRQVPVFLYHLNLGQDDTSTGST                                                                                                                                       | 578  |
| Myodes paramyxovirus                                  | WHALPLTGRITFVPLNIEWIQQTAVSRPGRSPCGASSRCPQQCVTVGVYD LFFPMGPNYEYSMTAFLDSETRVNPVLA FINTGSI IYRKTLTQSNQKAGYITTTTCFVKLRVWCISVVELSPSTITEFEPV PFLYQLDVGQRMSPSGQI                                                                                                                                       | 583  |
| Lophuromys jeilongvirus 1                             | WHSLPKIGI IAVGDQTYLHWVENAVSRPGPENCMYGNRCPQECLGAPYDIFPLDSNFEIGISVTLKSYQVKNKPVITLVTQNKI ISETEVNTDHHGAQYITTTSCFAYARSLWCLSI VAFEPATVGERAPVLLYKVPVYKASGTRLT                                                                                                                                          | 575  |
| Lophuromys jeilongvirus 2                             | WHALAQITGII DLTGDL SIQVVDQLVLSRPGTSCGPAANRCPKECVTVGVYD ADFPLGVNYDVS VVLA TQSTRSNRPLMVVNGNTI IYVKTVT SASQKASYITTTTCFVFKMRINWCLSI IELSPGAVGEFV PFLYQLNLGVDKDTGVT                                                                                                                                  | 584  |
| Shiyan Niviventer confucianus jeilongvirus (Shiyan22) | WHALPQLGLINLRNLAQIIMVDVAIGRPGSENCDA TSRCPNECLSGVYNDIIFPLGRYFEFGATVYLDSDRSRINPVIALMNTTNVFA RKTLT TPTQQAQYSTTTTCFMFKEKPVQVSVVEISPTALGSVVP IPEYTYITPLVCAATLSRIG                                                                                                                                    | 600  |
| Beilong virus strain Rn/Jingzhou151 (Jingzhou151)     | MRF TGKEG... TYKSGRYKSPRNECF FEKVS NKY Y FIVSTPEGIQPYEIRDLTPDRMPHIIMYISDVCAPALSAFKKLLPAMRPIITLTIGNWQFRPVEVSGGLRVNIGRNLKEGDLTMSAPEDPGSNTFPG... GHIPGN GILDAGY                                                                                                                                    | 726  |
| Tailam jeilongvirus                                   | MQFSGQDG... MYKSGRYKSPRNECF FEKVS NKY Y FVSTPEGIQPYEVRDLTPERVSHVIMYISDVCAPALSAFKKLLPAMRPIITLTIGNWQFRPVDISGGLRVNIYRNLTRYGDLMSAPEDPGTDFPG... THAPSKGHEEVGH                                                                                                                                        | 726  |
| Jingzhou Apodemus agrarius jeilongvirus (Jingzhou148) | LPLMGAQ... PYSVGPYEDPRNECFYFLRGDDTYFIVSIPSAIQAAYRQNPDTQGSSEGFIVEDLCLPLSAFKNMRPMSRGLSALVIGNLQRFVKITLGLRMLPDLSDNKDQVPAGVFSPEDPGHNPPFG... DLYTGDPCKNKHGR                                                                                                                                           | 726  |
| J-virus                                               | TPLDAHGG... TYLNTDPVGNKVDCYFILHEGQIYFGMSVGTVNYTYSIVGRSSEIAINMNVSLNLCHGVYNEFLKEQNSPGRPNIEVEGWLKRVQTVNQTGVFGLDDLEGEESGYGGPDPSPAIAPKPS... TAAAPIVPQKGG                                                                                                                                             | 709  |
| Jingzhou Mus musculus jeilongvirus (Jingzhou25)       | VPLDAHGG... TYLNTSPVGNKVDCYFILHEGQIYFGMSVGTVNYTYSIVGRSSEIAINMNVSLNLCHGVYNEFLKEQNSPGRPNIEVEGWLKRVQTVNQTGVFGLDDLEGEESGYGGPDPSPAIAPKPS... TAAAPIVPQKGG                                                                                                                                             | 720  |
| Myodes paramyxovirus                                  | MPLSYGER... SLSIGPYKPARKECYLEQVGDQYLIISIPNSIQAYTRDL DPEKIPHTGLYINDICPVLNVTMTSARMTAIMVQWQFRFVNRPGTRVNLNPNKANATRNEMYSPEDPGHSYVVDORLIDQYNYQTLPEGAL                                                                                                                                                 | 729  |
| Lophuromys jeilongvirus 1                             | IPIPYFSN... GSRPIVLLTNELYPPEVPKFTQDDFKNLQLSPYHERFGTTPGSPSTSKLQTRSLHVDSTQVIKQVTPTLTSEPTTREQTPTTANTLSTKEMLTIVKTI DENTTRITAQHDDTQRS... TQRL                                                                                                                                                        | 703  |
| Lophuromys jeilongvirus 2                             | EQLSSYSYSGKD... TYTLTPYETPKTECYLELSGDDMYFAVKVFGNHQSYRLTWKAQAKTTEDIAVTSQLCHEVLKYMTDRGDVFNNTVVDTEHVTLTPVTL SAGTRVTLTKTDSTPVANETTSMTAIKATLDR... TDR                                                                                                                                                | 716  |
| Shiyan Niviventer confucianus jeilongvirus (Shiyan22) | GDVGD DRSRIRLTVPSIDFAGGVTVSDELRSRWLEKLRLPPVLYPFNYSTVTVDFD TQDLLNYPVAVPVRTGSTVLGDGQSVAVRPVSDVPSSEG DPLTVGVQVSGALVQD TVVIGAASYDDQFESYRSTQIASG... TDR                                                                                                                                              | 736  |
| Beilong virus strain Rn/Jingzhou151 (Jingzhou151)     | YTYEYPKEW... KQTT... KPNEGNNMIDKNKTPVIPS KDSPT... SDSSTLHQESVEPVRPTREVLKSSDYITIVSSDSSGSGS GDFATG                                                                                                                                                                                                | 808  |
| Tailam jeilongvirus                                   | YTLPNEKLS... EVTTAAVKT KESLNLIPDTKDTRGEEENGSG... LNEITIGHTTPGHIKTHPAETKVTKHTV IIPQIEEDGSG... ATT                                                                                                                                                                                                | 808  |
| Jingzhou Apodemus agrarius jeilongvirus (Jingzhou148) | HCICYDSDWNEIYTPGDDYLFPPTTPRSTTVFRPVSMENHIINETQGVVTPSHNTKGNTITKSPDLNGENSVGKPGLNLTENSMRPPSQRPEVSP EHA G T K K G L E V E S Q R T P P S Q I T K I Q D N G T T K E T P G P Q V T P I I T D Q G T T E H H T                                                                                           | 876  |
| J-virus                                               | PNIPSSSTVKP... P Q K F T P T P K M A E D Q E T G Q G H V S G A P L L N T T S G K K I Q R... T E E E N Q R T G Y T T L A G L V R Q N I S E D E G G N Q L S S F T E T D D N V V A N R E K                                                                                                         | 709  |
| Jingzhou Mus musculus jeilongvirus (Jingzhou25)       | VEICLKLNRG... N N L T I I Q D I Q C R V Y K Y S R V K S N M S I G P T S S P T G I T M R D M I T Q L N K F S T A F S P P L Q C N H S F P C P C P C N C S S T I G T T K E P L T R L Q H N S T H T R T A G L N T S H N R L L S T T I K S A H V T N S S K R R D Q S                                 | 815  |
| Myodes paramyxovirus                                  | .TIT... T L N K T A Q T T E G T G Q H Q I T T H N I T R R D T P N... T D G H S I S T A R Q P N I Q S H T A K D E N T P D I Y N N V R R I G I Q R E T                                                                                                                                            | 862  |
| Lophuromys jeilongvirus 1                             | .TTR... S V T T R L T E S T A F N H T S S V L N Q I T V T P T S S T... T E A N H T S T P I T R V S Q H E T S S V T H G Q L N M L T N A T G S W R L R Y S N                                                                                                                                      | 776  |
| Lophuromys jeilongvirus 2                             | ... V N V S E Y I G E M Q Q D R S I A S K L L T H R S E D V E A M T K I R... Q L V L S M Q S D L T D P T K R D A A G A K L K N G I R M I L F N R S L E I L K G Y V T                                                                                                                            | 792  |
| Shiyan Niviventer confucianus jeilongvirus (Shiyan22) | ... V N V S E Y I G E M Q Q D R S I A S K L L T H R S E D V E A M T K I R... Q L V L S M Q S D L T D P T K R D A A G A K L K N G I R M I L F N R S L E I L K G Y V T                                                                                                                            | 815  |
| Beilong virus strain Rn/Jingzhou151 (Jingzhou151)     | GPWTGVSPKQNGINPPGTRLP HSTPLGGINTPAPPDPKTSVDSHTGNTIDSTASSRPLNHDTTGDIDTRINTETAIHGFTPGREATSSGKLISDLTNSTSVPSEAHP SASTSEANKPEKSTDSR... VNQDSTSESVEE... STTNA                                                                                                                                         | 952  |
| Tailam jeilongvirus                                   | STELQDETGYHTEDYNTNNGSLTAPNERNNYTSGDHTVSGEDITHITVSDRTKTQTLPTDNTFNQPTPKIQEGSPKSETPKDYIAIESDSHFTDPTLIRSTPEGTIVQVIGDQFHSAVTLQ... ESNAIGNSEPIDQ... GNNLI                                                                                                                                             | 954  |
| Jingzhou Apodemus agrarius jeilongvirus (Jingzhou148) | ISSNMTPTTIIASDTHSDTTPPTKGPDLNASTPKHTTISKTTTEGKNITPATSQKTEGDAFKIPNRNTPPNADQNTTTTTEPPEKTNNNIKYETSTRKSJNSTEVDNKTYTTTTINTPTPQGSSTSQTK... ETQLR                                                                                                                                                      | 1024 |
| J-virus                                               | QSSGNRVETTASLSQGHNREYNINSSNQPEISILHPTTSQLGPQYS... NHSDTNHNSISSNTPVVDKGTGDHTDLEVNLRITHTSSEVKSIVTKSTTPGSNQSNNKSEGDTPDKEILEATPKKTEINSQRSNLRMAPILDDDFGS                                                                                                                                             | 709  |
| Jingzhou Mus musculus jeilongvirus (Jingzhou25)       | ATHSHTSPETPASQTEKHHTATHPHPTPPTKDQGTGATGHPAANETSHP... TPRTTTPNDPIHHTTPPPGNPQPGNTAPHPEAATKAPTTTPQPRTNHTADAAPQADPPQKLNPT EQPIKTPPTPTTPTAPTTPNRTTEPNPENNDTPIH                                                                                                                                       | 962  |
| Myodes paramyxovirus                                  | KTSRSRDRRPPKQKQLDDYASKDQHNTFEDQGLWDKISSYLLPIQSDY YGIEDPELDSIDLFDYRHVTSSSHNRVMYIQ... TDR                                                                                                                                                                                                         | 854  |
| Lophuromys jeilongvirus 1                             | LFERGYSEMKNWGNNGD... TDR                                                                                                                                                                                                                                                                        | 810  |
| Lophuromys jeilongvirus 2                             | KKYFPQPQERTGQPQALPQVADVASTVDVANQASDILDVIVSEGVENPNLDSQLHELTRIVSGNQPMTL DANS DTLVTVENIHGSVDTIQIPAPPVAGPTPTMDTAITPTVEIDEQESIQLNPPANGKPATNNADSDDRDGGLI... TDR                                                                                                                                       | 959  |
| Shiyan Niviventer confucianus jeilongvirus (Shiyan22) | KKYFPQPQERTGQPQALPQVADVASTVDVANQASDILDVIVSEGVENPNLDSQLHELTRIVSGNQPMTL DANS DTLVTVENIHGSVDTIQIPAPPVAGPTPTMDTAITPTVEIDEQESIQLNPPANGKPATNNADSDDRDGGLI... TDR                                                                                                                                       | 959  |
| Beilong virus strain Rn/Jingzhou151 (Jingzhou151)     | PVDDKYSTRLTDTRSNTGDPEWTSQHSS... STTRGEVKPSLPGITETSTRQRT... EAATPPELVNNTLNPSTQVRSVRSMLMQDAIAQAWNFRVGVTP... TDR                                                                                                                                                                                   | 1046 |
| Tailam jeilongvirus                                   | PTTDRGTMNDNTSSQSHSSTTSGQSHSAGHGSQSNMNL TALA D T D S V T D Q S T S T... QEIDHEHENVSSILNPLSRHTRVMRDTVQEALTGAWGFRGMIP... TDR                                                                                                                                                                       | 1052 |
| Jingzhou Apodemus agrarius jeilongvirus (Jingzhou148) | PDQESGDNLATEKPSSTSTRNPTGTSANSTEDPIKEDQTSIIQRNITRFQDDHNTIQESNKAEENHSTTPKYETERESA IPELEQDTLPRPAKHEEPKMSTTPSLKRDNETQP TQ G K D V D E D R E S Q K E A N I H E K N T N M T E I K S T L V P G                                                                                                         | 1174 |
| J-virus                                               | LYQDPDGNAGNSYRLDLQRDDQVGSIMEMALSSFLVHSGALKNGDDYNNHPRSTP... VQNDQRLTILTGNDNQLPSEY YEGGSGYSGDYGYGTYNLNLGLMTTRGRLSFNSMINSIVGHERYSSIGYIADCSSGDDPPYQSI CVNDVMVIST                                                                                                                                    | 709  |
| Jingzhou Mus musculus jeilongvirus (Jingzhou25)       | PHNDPTRDTTTTSPANHNLTDPHGDEAEGTITSETTSRSKPAAGDTKETHE TLD... SPKDPHVDTTTSATTTDEGVDKTSTNTTQAHAPTKQRSQT T D N T T R P D S P Q D T S Q T D T P R D Q P N S P G A D P G P P T D P P E Q R G G Q P D N                                                                                                 | 1111 |
| Myodes paramyxovirus                                  | ... TDR                                                                                                                                                                                                                                                                                         | 1156 |
| Lophuromys jeilongvirus 1                             | ... TDR                                                                                                                                                                                                                                                                                         | 854  |
| Lophuromys jeilongvirus 2                             | ... TDR                                                                                                                                                                                                                                                                                         | 810  |
| Shiyan Niviventer confucianus jeilongvirus (Shiyan22) | ... TDR                                                                                                                                                                                                                                                                                         | 959  |
| Beilong virus strain Rn/Jingzhou151 (Jingzhou151)     | ... TDR                                                                                                                                                                                                                                                                                         | 1046 |
| Tailam jeilongvirus                                   | ... TDR                                                                                                                                                                                                                                                                                         | 1052 |
| Jingzhou Apodemus agrarius jeilongvirus (Jingzhou148) | TKFLADYCNGTISMLAVLLQIDFIDSNVFLADKPKKIVPPNYLFCFNHHALIHQAPFETYKFEVNRRIIQMGPPWHGTYFVKIAPKDDVSVGRLPFGKKDFLDWWSHLANKSELTCVLSLCEGYPLVVYRNGDIILGFYISYKNSVDMT                                                                                                                                           | 1324 |
| J-virus                                               | ... TDR                                                                                                                                                                                                                                                                                         | 709  |
| Jingzhou Mus musculus jeilongvirus (Jingzhou25)       | EYNYDLLRRSMQPTNYKPIGSSRPALPRAMDYTDKNTGIGPLYLEGLCFCDGVL R D T H G E D Y I P H E F I P I I K D R... T L F V G M S P A T K I K Q E Y E E M E K R N N L S K V D M S I N W D E N T L N P Y Y V L P S R I N A R Y P L T I T S F                                                                       | 1248 |
| Myodes paramyxovirus                                  | KKQEETSSNNTKPEDAKITPDKAESRETSKPNSSIP TKEEERPNSQPLLRGGESQTLRLSNIEDLHIDDTSPSHTSHSEVQPTPKPPSEENPSFELIDVSHNMPKPEDESLTKPCYQIDRHCTDNYLSTIGPLIDCYNKTEEVL CRLQTQT                                                                                                                                       | 1306 |
| Lophuromys jeilongvirus 1                             | ... TDR                                                                                                                                                                                                                                                                                         | 854  |
| Lophuromys jeilongvirus 2                             | ... TDR                                                                                                                                                                                                                                                                                         | 810  |
| Shiyan Niviventer confucianus jeilongvirus (Shiyan22) | ... TDR                                                                                                                                                                                                                                                                                         | 959  |
| Beilong virus strain Rn/Jingzhou151 (Jingzhou151)     | ... TDR                                                                                                                                                                                                                                                                                         | 1046 |
| Tailam jeilongvirus                                   | ... TDR                                                                                                                                                                                                                                                                                         | 1052 |
| Jingzhou Apodemus agrarius jeilongvirus (Jingzhou148) | KFKLADYCNGTISMLAVLLQIDFIDSNVFLADKPKKIVPPNYLFCFNHHALIHQAPFETYKFEVNRRIIQMGPPWHGTYFVKIAPKDDVSVGRLPFGKKDFLDWWSHLANKSELTCVLSLCEGYPLVVYRNGDIILGFYISYKNSVDMT                                                                                                                                           | 1474 |
| J-virus                                               | ... TDR                                                                                                                                                                                                                                                                                         | 709  |
| Jingzhou Mus musculus jeilongvirus (Jingzhou25)       | MLVWNNLQKRVLGEVCFGLVLIKGYFPVYLYKGN TNSYIFALSR TMDFSN... YGSKSLVSV ECLCKVVIDRSNLEKLNKGTSMSCGFISLHIMTTYMLRNSGTPDENL VFDQDGI R L G Y T T E G T V N L T V I E S E K D P I V D G T T P A K K P V Q D T S                                                                                             | 1397 |
| Myodes paramyxovirus                                  | IDYMEKNCPGGYLN TSMASLGVAYSEYGDCCRGESLKPGHNYICMINGTSYLADREFICRKPYSKVMNTLLTTKLFHSSQSPFDTVGHLLIGKYPSYQEFIEWAGHYPRPTEYMCGLGEFCGYTFVFFLSPDFNAYFEPITYYKSI EK                                                                                                                                          | 1456 |
| Lophuromys jeilongvirus 1                             | ... TDR                                                                                                                                                                                                                                                                                         | 854  |
| Lophuromys jeilongvirus 2                             | ... TDR                                                                                                                                                                                                                                                                                         | 810  |
| Shiyan Niviventer confucianus jeilongvirus (Shiyan22) | ... TDR                                                                                                                                                                                                                                                                                         | 959  |
| Beilong virus strain Rn/Jingzhou151 (Jingzhou151)     | ... TDR                                                                                                                                                                                                                                                                                         | 1046 |
| Tailam jeilongvirus                                   | ... TDR                                                                                                                                                                                                                                                                                         | 1052 |
| Jingzhou Apodemus agrarius jeilongvirus (Jingzhou148) | TMPPRSLTESEICRAVMDKMTTTDTRGIEISIEKEGKNLLLQSTDDVEFFSLTMSGGKQVQYSMQRVVYVPGYVERLRPGKEPKSENHEEVVIAAHTLLETNTTSDSVLHNAKEKYHSL... MNALRRFWG... TDR                                                                                                                                                     | 1602 |
| J-virus                                               | ... TDR                                                                                                                                                                                                                                                                                         | 709  |
| Jingzhou Mus musculus jeilongvirus (Jingzhou25)       | SKDPSFLGGYLGWW... TDR                                                                                                                                                                                                                                                                           | 1412 |
| Myodes paramyxovirus                                  | LNRSPIQIYNLCGRVFEVADQLTEPYHNVIITPLKNKVLILRSLSYNDFADLGGNKTSCTDILQRRAYFS... VETSVAKEARKNKGLKLEAVTKSPNEKITRMKRATNPSYGATPSYDTFGDLILSALESWYKR                                                                                                                                                        | 1588 |
| Lophuromys jeilongvirus 1                             | ... TDR                                                                                                                                                                                                                                                                                         | 854  |
| Lophuromys jeilongvirus 2                             | ... TDR                                                                                                                                                                                                                                                                                         | 810  |
| Shiyan Niviventer confucianus jeilongvirus (Shiyan22) | ... TDR                                                                                                                                                                                                                                                                                         | 959  |

Figure S2: Multiple alignment of amino acid sequences of G proteins of jeilongviruses.

Table S1. Primers used for nested RT-PCR to obtain complete virus genome sequences.

| Sample     | First round |                           | Second round |                           |
|------------|-------------|---------------------------|--------------|---------------------------|
|            | Primer name | Primer sequence (5'-3')   | Primer name  | Primer sequence (5'-3')   |
| Huangshi10 | 1F          | GCCTACCAACCATGTCAACA      | N-1F         | ATCAAACCACCTGATCCTTCTG    |
|            | 1R          | CTGACTACTCACTTGAATCCTAAG  | N-1R         | GTTCCAACCTGCCATGAATCTC    |
|            | 2F          | AAGTCCCTTAGATGGTCTTGAT    | N-2F         | GAACACAACCAGGTGATTACTG    |
|            | 2R          | TCTCTGACTTTCCCYCATATG     | N-2R         | CTTGTRGCATTAGTCTTGYTGTG   |
|            | 2F          | GGACGACCATATAGCTCTGTG     | N-2F         | CGATCTCAAACCTATTCTTGGA    |
|            | 2R          | CCARTGAACCTGAGCATTKGTG    | N-2R         | ACTAGATAATAGATCAGGAGCATG  |
|            | 3F          | GTCTACTGTGGAGGAACCAG      | N-3F         | CATCAGCTCCGAAAGAGTTC      |
|            | 3R          | GCTCTGATTGATCTAGCAGAAC    | N-3R         | GTTGAGTCTATCCATAGCATGC    |
|            | 3F          | GCATGCTATGGATAGACTCAAC    | N-3F         | GTTCTGCTAGATCAATCAGAGC    |
|            | 3R          | GCCACGAGCAATTTTAGCTG      | N-3R         | AAGGGTCTTCTTCTCCCATC      |
|            | 4F          | GATGGGAGAAGAAGACCCTT      | N-4F         | CAGCTAAAATTGCTCGTGGC      |
|            | 4R          | TGTTATYCCACAATCYTYGTGG    | N-4R         | GAAGAGCCCYTCTARITTTGTAG   |
|            | 4F          | GACATAGGAAGAATACCCATTCA   | N-4F         | GATTGCTACATTATCACAGTATGGA |
|            | 4R          | AATCTYCCWACRCCGTTAGATAT   | N-4R         | CATGCTCTCATYTTRTAGGTCATC  |
|            | 5F          | ACTATCAATCCAACATGACAGC    | N-5F         | AGACCTATACTTGACAATCCACA   |
|            | 5R          | GCATAGATAACCTTGCTGCTTC    | N-5R         | TTTCTGGAATTGAACGAAGGC     |
|            | 5F          | TCGYGACAARAGCACTCAAGT     | N-5F         | GGGAGRMGAGTRGACACYAAC     |
|            | 5R          | ATGGATTGAACCTCGCTGAC      | N-5R         | ACCTAAGTAATGTTGATAGACTGC  |
|            | 6F          | TYGGTRTMTCACTCAACAATTACG  | N-6F         | ACTCAACTGCWTGTTAYAARGCT   |
|            | 6R          | CAAAATTGGCCATAGAACTTACT   | N-6R         | TCAGGGACTGGAAGTGGAC       |
| Shiyan201  | 1F          | ACGTAATCCTTAAGAATCAAAGAT  | N-1F         | GTTCAAGGAGTATCAAGCAAAC    |
|            | 1R          | TGCCATCATYTGACCRAGTCTG    | N-1R         | CCATRGCRAARCTCCAWAGYAA    |
|            | 2F          | CAGTGAGAAAAGTTCATGGTCGA   | N-2F         | GAAGTCAAGAAGAGCGGAGC      |
|            | 2R          | CYAAACATCAGWGCYTTGTACTCC  | N-2R         | CCTCAGGTACAGAGTTGATGAAC   |
|            | 2F          | GAGGCGATAAGTGAAAGGCAT     | N-3F         | CATGACGACAAGCTCAAACAAAT   |
|            | 2R          | TTAGTCATRTCAAGTGGCTCCA    | N-3R         | AGGKCCTYTCATTTGATGACA     |
|            | 3F          | GATACAAGGAACAGAGTAGATGC   | N-4F         | CGTAGTGTAGGGAAATTAGGTCT   |
|            | 3R          | CWACWGCTCCYAAKGAGAAGAC    | N-4R         | CCTATATGAAGCATRAAYGTGGC   |
|            | 3F          | GATTCAGAGAACACAATGCA      | N-5F         | CAATCTGCTTGTCTCTTTGCT     |
|            | 3R          | AKAYCATYAAWCCTCTRATCARTC  | N-5R         | TRCAACTRTTCTGCATYTGWT     |
|            | 4F          | GATCAACCCGGAACAAATACCT    | N-6F         | TGTC AAGATAAGCACCTACCTTG  |
|            | 4R          | GGTGTWGCATARTCGTTGTAGC    | N-6R         | TCAAGAGAACGTATCGAGGGAC    |
|            | 4F          | CACTGGCAATATAATAGGTGTGG   | N-7F         | GCCCTGGAGATACATTTTCTTA    |
|            | 4R          | TGRCTKGGTATGGTKACACTRAC   | N-7R         | TTCGCCTTTRACAATTTGRTCTA   |
|            | 5F          | TTGCTGATGGGGTTACTAAT      | N-8F         | GGCTAACATGCTCCTAATAATCA   |
|            | 5R          | AAGCACTTAGTTATAGTTGAYCC   | N-8R         | CTGRTCTATRACCTCATTYGGTG   |
|            | 5F          | GGTAYGGWCARACAGARAGGA     | N-9F         | GYARTGGWGGTMGWATATGYCC    |
|            | 5R          | GTTRCAYTCKGGRTAYGGTACATG  | N-9R         | GACCYAATTTCCCATTYTGTATTC  |
|            | 6F          | TCRGATGTGYTKTATCCWGAATG   | N-10F        | TRGAYAGTCTATWGTWGCWGG     |
|            | 6R          | ACTCTGGATCATTCTTATARTCACC | N-10R        | TTCTGAACARATAGGTGATAATGC  |
|            | 6F          | GRGCWCATTCTAATGGYGAAGC    | N-11F        | CATGARATGTGTGCWACYAAYTGG  |
|            | 6R          | CCTARWGCWGCYARATTDTCYCT   | N-11R        | GWGCYCKYTCWGCATRATTCT     |
|            | 7F          | GCCMTTRATACARAATCARTCATGG | N-12F        | GCATGTCTTTACCTGCACC       |
|            | 7R          | GRTGWAGATCMGWATAGTCCATTC  | N-12R        | GRTCACTTTCKATCAAWGGRTTRC  |
|            | 7F          | TTTCARCARGTKATGCTCTTAGG   | N-13F        | CACCCAAGGARAATATCATAATGC  |
|            | 7R          | CATTGGYTCYTTMYCMATKCCAC   | N-13R        | CCAAGTTGTTTCWGGTCTSCC     |
|            | 8F          | GGATTTACTCCCATACTACTCC    | N-14F        | GACAGGGTATTAGGTCCAAGC     |
|            | 8R          | AACTCACTTGTCTGACTAGATC    | N-14R        | TACTTGGTTTTGGGACTGGC      |
